# Supplementary material
Source: HighWire-hosted journal article supplement (https://hw-f5-jim.highwire.org/content/70/3/805)
Supplement: inline-supplementary-material-1 [file inline-supplementary-material-1.pdf]

Table S1. Identified co-different genus associated with RAS, which showed a positive difference equal to or higher than 10% (in terms of relative abundance).

| Contributing OTU | NSctrl<br>(n=28) | NSras<br>(n=31) | Sras<br>(n=19) | P1   | P2   | P3   |
|------------------|------------------|-----------------|----------------|------|------|------|
| Acholeplasma     | 0.157±0.043      | 0.0087±0.00     | 0.046±0.018    | 0.00 | 0.01 | 0.06 |
|                  | 4                | 45              | 7              | 1    | 8    | 7    |
| Acidaminococcus  | 0.0004±0.00      | 0±0             | 0.0001±0.00    | 0.02 | 0.41 | 0.38 |
|                  | 04               |                 | 01             | 4    | 2    | 0    |
| Acidibacter      | 0.0004±0.00      | 0±0             | 0±0            | 0.01 | 0.08 | 1.00 |
|                  | 04               |                 |                | 1    | 8    | 0    |
| Aeromonas        | 0.0001±0.00      | 0.0007±0.00     | 0±0            | 0.02 | 0.51 | 0.00 |
|                  | 01               | 07              |                | 5    | 8    | 9    |
| Anaeroglobus     | 0.0551±0.01      | 0.0186±0.00     | 0.0175±0.00    | 0.01 | 0.01 | 0.93 |
|                  | 46               | 63              | 38             | 7    | 5    | 5    |
| Anaerovorax      | 0.0014±0.00      | 0±0             | 0.0004±0.00    | 0.00 | 0.03 | 0.02 |
|                  | 11               |                 | 04             | 0    | 1    | 1    |
| Asteroleplasma   | 0.0036±0.00      | 0.0001±0.00     | 0.0004±0.00    | 0.00 | 0.01 | 0.07 |
|                  | 13               | 01              | 03             | 2    | 5    | 3    |
| Bacteroidales    | 0.2323±0.09      | 0.0083±0.00     | 0.0014±0.00    | 0.00 | 0.00 | 0.16 |
|                  |                  | 47              | 09             | 4    | 1    | 6    |
| Bacteroides      | 0.0969±0.01      | 0.0172±0.00     | 0.022±0.008    | 0.00 | 0.00 | 0.63 |
|                  | 79               | 55              | 4              | 1    | 1    | 3    |

|                    |             |             |             |      |      |      |
|--------------------|-------------|-------------|-------------|------|------|------|
| Bilophila          | 0.0003±0.00 | 0±0         | 0±0         | 0.05 | 0.15 | 1.00 |
|                    | 03          |             |             | 1    | 3    | 0    |
| Bryobacter         | 0.0007±0.00 | 0±0         | 0±0         | 0.00 | 0.01 | 1.00 |
|                    | 07          |             |             | 1    | 4    | 0    |
| Ca.                | 0.0032±0.00 | 0.0002±0.00 | 0.0015±0.00 | 0.00 | 0.29 | 0.00 |
| Endomicrobium      | 12          | 02          | 11          | 5    | 4    | 0    |
| Ca. Tammella       | 0.0031±0.00 | 0±0         | 0.0003±0.00 | 0.00 | 0.00 | 0.05 |
|                    | 1           |             | 02          | 1    | 7    | 5    |
| Catonella          | 0.6601±0.09 | 0.4024±0.05 | 0.4044±0.06 | 0.01 | 0.03 | 0.98 |
|                    | 8           | 46          | 77          | 7    | 8    | 3    |
| Centipeda          | 0.184±0.036 | 0.0831±0.01 | 0.1057±0.02 | 0.01 | 0.08 | 0.42 |
|                    | 7           | 83          | 13          | 1    | 6    | 7    |
| Christensenellacea | 0.0025±0.00 | 0.0003±0.00 | 0±0         | 0.04 | 0.00 | 0.30 |
| e                  | 14          | 02          |             | 5    | 2    | 5    |
| Crenarchaeota      | 0±0         | 0.0004±0.00 | 0±0         | 0.03 | 1.00 | 0.08 |
|                    |             | 02          |             | 2    | 0    | 9    |
| Defluviitaleaceae  | 0.085±0.018 | 0.026±0.005 | 0.0326±0.00 | 0.00 | 0.01 | 0.50 |
|                    | 9           | 2           | 75          | 1    | 6    | 4    |
| Deinococcus        | 0.0004±0.00 | 0.0011±0.00 | 0±0         | 0.03 | 0.08 | 0.00 |
|                    | 04          | 11          |             | 0    | 6    | 1    |
| Desulfobulbus      | 0.0058±0.00 | 0.0019±0.00 | 0.0059±0.00 | 0.01 | 0.97 | 0.16 |
|                    | 12          | 07          | 25          | 0    | 5    | 5    |

|                  |             |             |             |      |      |      |
|------------------|-------------|-------------|-------------|------|------|------|
| Desulfomicrobium | 0.0062±0.00 | 0±0         | 0.0002±0.00 | 0.00 | 0.01 | 0.14 |
|                  | 36          |             | 02          | 1    | 9    | 4    |
| Dialister        | 0.2031±0.04 | 0.0612±0.00 | 0.098±0.02  | 0.00 | 0.01 | 0.09 |
|                  | 11          | 81          |             | 1    | 9    | 9    |
| Eggerthia        | 0.0231±0.00 | 0.0019±0.00 | 0.0067±0.00 | 0.00 | 0.07 | 0.33 |
|                  | 79          | 05          | 42          | 1    | 4    | 1    |
| Elizabethkingia  | 0±0         | 0.0006±0.00 | 0±0         | 0.00 | 1.00 | 0.01 |
|                  |             | 04          |             | 4    | 0    | 6    |
| Elusimicrobia    | 0.0137±0.00 | 0.0001±0.00 | 0.0027±0.00 | 0.00 | 0.16 | 0.08 |
|                  | 84          | 01          | 19          | 3    | 4    | 5    |
| Enterococcus     | 0.0011±0.00 | 0.0004±0.00 | 0.0005±0.00 | 0.03 | 0.17 | 0.75 |
|                  | 06          | 02          | 04          | 0    | 9    | 8    |
| Ezakiella        | 0.014±0.004 | 0.0007±0.00 | 0.0091±0.00 | 0.00 | 0.45 | 0.03 |
|                  | 2           | 04          | 53          | 1    | 9    | 6    |
| Filifactor       | 0.4198±0.07 | 0.1159±0.02 | 0.3909±0.18 | 0.00 | 0.90 | 0.07 |
|                  | 23          | 42          | 82          | 1    | 1    | 1    |
| Fretibacterium   | 0.2809±0.09 | 0.0685±0.01 | 0.1636±0.03 | 0.00 | 0.31 | 0.02 |
|                  | 71          | 54          | 69          | 2    | 4    | 5    |
| Geobacter        | 0.0001±0.00 | 0.0007±0.00 | 0±0         | 0.02 | 0.51 | 0.00 |
|                  | 01          | 05          |             | 5    | 8    | 9    |
| Ignavibacteria   | 0.0035±0.00 | 0±0         | 0.0016±0.00 | 0.00 | 0.54 | 0.00 |
|                  | 26          |             | 14          | 1    | 3    | 0    |

|                     |             |             |             |      |      |      |
|---------------------|-------------|-------------|-------------|------|------|------|
| Kocuria             | 0.0008±0.00 | 0±0         | 0±0         | 0.00 | 0.00 | 1.00 |
|                     | 05          |             |             | 0    | 4    | 0    |
| Lachnoanaerobaculum | 0.2657±0.02 | 0.41±0.062  | 0.3901±0.06 | 0.03 | 0.08 | 0.82 |
|                     | 93          |             | 42          | 2    | 9    | 6    |
| Lactococcus         | 0.0014±0.00 | 0.0006±0.00 | 0±0         | 0.03 | 0.00 | 0.01 |
|                     | 06          | 03          |             | 7    | 0    | 6    |
| Lentimicrobiaceae   | 0.1711±0.04 | 0.0502±0.00 | 0.0749±0.02 | 0.00 | 0.07 | 0.41 |
|                     | 68          | 91          | 46          | 4    | 1    | 2    |
| Leptotrichia        | 1.7866±0.22 | 3.9499±0.82 | 2.7362±0.46 | 0.00 | 0.08 | 0.23 |
|                     | 49          | 34          | 72          | 4    | 0    | 7    |
| Lysobacter          | 0.0015±0.00 | 0.0006±0.00 | 0.0007±0.00 | 0.02 | 0.07 | 1.00 |
|                     | 07          | 03          | 05          | 5    | 5    | 0    |
| Microbacterium      | 0.0005±0.00 | 0.0001±0.00 | 0±0         | 0.03 | 0.04 | 1.00 |
|                     | 04          | 01          |             | 1    | 7    | 0    |
| Moraxella           | 0.5556±0.21 | 0.1133±0.07 | 0.008±0.005 | 0.03 | 0.00 | 0.11 |
|                     | 06          | 22          | 8           | 9    | 2    | 5    |
| Morganella          | 0.0048±0.00 | 0±0         | 0±0         | 0.00 | 0.02 | 1.00 |
|                     | 3           |             |             | 1    | 3    | 0    |
| Moryella            | 0.0079±0.00 | 0.0013±0.00 | 0.002±0.000 | 0.00 | 0.00 | 0.24 |
|                     | 13          | 04          | 9           | 1    | 1    | 5    |
| Mycoplasma          | 0.1001±0.02 | 0.0374±0.00 | 0.0517±0.01 | 0.00 | 0.05 | 0.34 |
|                     | 12          | 78          | 37          | 6    | 9    | 4    |

|                  |             |             |             |      |      |      |
|------------------|-------------|-------------|-------------|------|------|------|
| Nitrospiraceae   | 0.001±0.000 | 0.0001±0.00 | 0±0         | 0.00 | 0.00 | 1.00 |
|                  | 9           | 01          |             | 1    | 1    | 0    |
| Paracoccus       | 0.001±0.000 | 0.0003±0.00 | 0.0008±0.00 | 0.01 | 0.65 | 0.11 |
|                  | 4           | 02          | 06          | 6    | 8    | 7    |
| Parascardovia    | 0±0         | 0.0008±0.00 | 0±0         | 0.00 | 1.00 | 0.00 |
|                  |             | 05          |             | 1    | 0    | 5    |
| Parvimonas       | 0.2109±0.04 | 0.0965±0.01 | 0.115±0.023 | 0.00 | 0.04 | 0.52 |
|                  | 29          | 54          |             | 2    | 3    | 7    |
| Pelospora        | 0.0077±0.00 | 0.0004±0.00 | 0.0043±0.00 | 0.00 | 0.47 | 0.31 |
|                  | 28          | 03          | 35          | 1    | 1    | 9    |
| Phocaeicola      | 0.0241±0.00 | 0.005±0.001 | 0.0161±0.00 | 0.00 | 0.37 | 0.04 |
|                  | 36          |             | 71          | 1    | 9    | 8    |
| Porphyromonas    | 6.5812±0.49 | 4.3845±0.59 | 4.6934±0.81 | 0.00 | 0.04 | 0.76 |
|                  | 88          | 54          | 42          | 6    | 6    | 9    |
| Propionivibrio   | 0.0022±0.00 | 0.0003±0.00 | 0.001±0.000 | 0.03 | 0.24 | 0.05 |
|                  | 09          | 02          | 6           | 1    | 2    | 4    |
| Pseudoramibacter | 0.0059±0.00 | 0.0019±0.00 | 0.0031±0.00 | 0.02 | 0.12 | 0.48 |
|                  | 15          | 1           | 11          | 1    | 1    | 4    |
| Pyramidobacter   | 0.0057±0.00 | 0.0009±0.00 | 0.0005±0.00 | 0.00 | 0.00 | 0.35 |
|                  | 15          | 04          | 03          | 4    | 2    | 1    |
| Ralstonia        | 0.0016±0.00 | 0.0007±0.00 | 0.0026±0.00 | 0.02 | 0.50 | 0.15 |
|                  | 08          | 03          | 12          | 0    | 1    | 0    |

|                         |             |             |             |      |      |      |
|-------------------------|-------------|-------------|-------------|------|------|------|
| Rhodospirillales        | 0.0055±0.00 | 0.0001±0.00 | 0.0018±0.00 | 0.00 | 0.08 | 0.00 |
|                         | 19          | 01          | 1           | 2    | 2    | 0    |
| Rickettsiales           | 0.0001±0.00 | 0.0017±0.00 | 0.0002±0.00 | 0.00 | 1.00 | 0.00 |
|                         | 01          | 15          | 02          | 0    | 0    | 0    |
| Rikenellaceae           | 0.1195±0.02 | 0.0205±0.00 | 0.0675±0.02 | 0.00 | 0.09 | 0.03 |
|                         | 32          | 51          | 12          | 1    | 9    | 3    |
| Roseburia               | 0.0759±0.01 | 0.0076±0.00 | 0.042±0.015 | 0.00 | 0.07 | 0.00 |
|                         | 24          | 21          | 1           | 1    | 8    | 7    |
| Rothia                  | 0.2585±0.04 | 0.6597±0.16 | 0.4548±0.13 | 0.00 | 0.20 | 0.32 |
|                         | 23          | 13          | 16          | 6    | 7    | 5    |
| Sediminispirochaet<br>a | 0.0058±0.00 | 0.0001±0.00 | 0.0012±0.00 | 0.00 | 0.11 | 0.00 |
|                         | 26          | 01          | 12          | 4    | 8    | 0    |
| Shuttleworthia          | 0.0137±0.00 | 0.0033±0.00 | 0.0059±0.00 | 0.00 | 0.05 | 0.30 |
|                         | 35          | 12          | 21          | 3    | 1    | 1    |
| Sneathia                | 0±0         | 0.0006±0.00 | 0.0019±0.00 | 0.00 | 0.00 | 0.00 |
|                         |             | 06          | 11          | 4    | 0    | 7    |
| Sphaerochaeta           | 0.0027±0.00 | 0.0003±0.00 | 0.0003±0.00 | 0.01 | 0.02 | 1.00 |
|                         | 13          | 02          | 02          | 9    | 3    | 0    |
| Spirochaetaceae         | 2.2324±0.26 | 0.5967±0.09 | 1.0848±0.22 | 0.00 | 0.00 | 0.05 |
|                         | 93          | 03          | 17          | 1    | 4    | 1    |
| Spirochaetes            | 0.0013±0.00 | 0±0         | 0±0         | 0.00 | 0.00 | 1.00 |
|                         | 1           |             |             | 0    | 0    | 0    |

|                  |             |             |             |      |      |      |
|------------------|-------------|-------------|-------------|------|------|------|
| Steroidobacter   | 0.0006±0.00 | 0±0         | 0±0         | 0.00 | 0.02 | 1.00 |
|                  | 06          |             |             | 3    | 5    | 0    |
| Succiniclasticum | 0.0012±0.00 | 0±0         | 0.0001±0.00 | 0.00 | 0.00 | 0.38 |
|                  | 06          |             | 01          | 0    | 2    | 0    |
| Terrimonas       | 0.0004±0.00 | 0±0         | 0±0         | 0.02 | 0.08 | 1.00 |
|                  | 03          |             |             | 4    | 6    | 0    |
| Veillonella      | 4.4598±0.84 | 7.1675±0.75 | 8.1253±1.56 | 0.01 | 0.04 | 0.55 |
|                  | 22          | 94          | 18          | 9    | 8    | 1    |
| Weissella        | 0.0016±0.00 | 0.0003±0.00 | 0.0004±0.00 | 0.00 | 0.01 | 0.48 |
|                  | 05          | 01          | 03          | 0    | 3    | 9    |
| Wolinella        | 0.0169±0.00 | 0.0009±0.00 | 0.003±0.001 | 0.00 | 0.00 | 0.08 |
|                  | 35          | 04          | 1           | 1    | 1    | 6    |
| Xanthomonas      | 0±0         | 0.0004±0.00 | 0.0001±0.00 | 0.03 | 0.40 | 0.26 |
|                  |             | 02          | 01          | 2    | 4    | 4    |

NSctrl, non-smoker/healthy; NSras, non-smoker/Recurrent aphthous stomatitis; Sras, smoker/ recurrent aphthous stomatitis. P1-value, NSctrl vs. NSras; P2-value, NSctrl vs. Sras; P3-value, NSras vs. Sras.

Table S2. Identified co-different species associated with RAS, which showed a positive difference equal to or higher than 10% (in terms of relative abundance).

| Contributing OTU                                         | NSctrl<br>(n=28)  | NSras<br>(n=31)   | Sras<br>(n=19)    | P1        | P2        | P3        |
|----------------------------------------------------------|-------------------|-------------------|-------------------|-----------|-----------|-----------|
| Acholeplasma_sp_KDA-feline;                              | 0.0056±<br>0.0021 | 0.0003±<br>0.0003 | 0.0008±<br>0.0005 | 0.0<br>05 | 0.0<br>16 | 0.2<br>32 |
| Acholeplasmatales_bacterium_cani<br>ne_oral_taxon_172;   | 0.0392±<br>0.0152 | 0.0015±<br>0.001  | 0.0298±<br>0.0144 | 0.0<br>01 | 0.6<br>69 | 0.0<br>07 |
| Actinomyces_sp_oral_taxon_414;                           | 0.0027±<br>0.0009 | 0.0005±<br>0.0002 | 0.0013±<br>0.0009 | 0.0<br>13 | 0.2<br>82 | 0.0<br>32 |
| Actinomyces_weissii;                                     | 0.0008±<br>0.0006 | 0.0002±<br>0.0002 | 0.0001±<br>0.0001 | 0.0<br>29 | 0.0<br>35 | 1.0<br>00 |
| Aeromonas_veronii;                                       | 0.0001±<br>0.0001 | 0.0007±<br>0.0007 | 0±0               | 0.0<br>25 | 0.5<br>18 | 0.0<br>09 |
| Aggregatibacter_segnis;                                  | 0.555±0.<br>1131  | 0.1483±<br>0.0313 | 0.1518±<br>0.0529 | 0.0<br>01 | 0.0<br>03 | 0.9<br>65 |
| Alphaproteobacteria_bacterium_ca<br>nine_oral_taxon_081; | 0.0055±<br>0.0019 | 0.0001±<br>0.0001 | 0.0018±<br>0.001  | 0.0<br>04 | 0.0<br>92 | 0.0<br>00 |
| Bacteroidales_genomosp_P1;                               | 0.025±0.<br>0141  | 0.0007±<br>0.0004 | 0.0042±<br>0.0031 | 0.0<br>01 | 0.0<br>65 | 0.2<br>71 |
| Bacteroidales_genomosp_P4_oral_<br>clone_MB2_G17;        | 0.1665±<br>0.0468 | 0.0437±<br>0.0084 | 0.0681±<br>0.0242 | 0.0<br>03 | 0.0<br>63 | 0.3<br>98 |



|                                              |          |         |          |     |     |     |
|----------------------------------------------|----------|---------|----------|-----|-----|-----|
| Bacteroidales_oral_clone_MCE7_164;           | 0.0592±  | 0.0131± | 0.0531±  | 0.0 | 0.8 | 0.0 |
|                                              | 0.0136   | 0.0034  | 0.0186   | 01  | 11  | 40  |
| Bacteroides_coprocola;                       | 0.0004±  | 0±0     | 0±0      | 0.0 | 0.0 | 1.0 |
|                                              | 0.0002   |         |          | 11  | 88  | 00  |
| Bacteroidia_bacterium_canine_oral_taxon_041; | 0.0286±  | 0.0066± | 0.0103±  | 0.0 | 0.0 | 0.2 |
|                                              | 0.0062   | 0.0023  | 0.0022   | 02  | 01  | 76  |
| Bacteroidia_bacterium_feline_oral_taxon_115; | 0.0067±  | 0.0001± | 0±0      | 0.0 | 0.0 | 0.5 |
|                                              | 0.0031   | 0.0001  |          | 02  | 02  | 29  |
| Bacteroidia_bacterium_feline_oral_taxon_141; | 0.2323±  | 0.0083± | 0.0014±  | 0.0 | 0.0 | 0.1 |
|                                              | 0.09     | 0.0047  | 0.0009   | 02  | 04  | 62  |
| Butyrivibrio_sp_Marseille-P2984;             | 0.0011±  | 0.0003± | 0±0      | 0.0 | 0.0 | 0.1 |
|                                              | 0.0005   | 0.0001  |          | 23  | 01  | 64  |
| Butyrivibrio_sp_oral_clone_DA074;            | 0.0019±  | 0.0004± | 0.0001±  | 0.0 | 0.0 | 0.2 |
|                                              | 0.0007   | 0.0002  | 0.0001   | 00  | 00  | 64  |
| Campylobacter_gracilis;                      | 0.0586±  | 0.0274± | 0.0443±  | 0.0 | 0.3 | 0.0 |
|                                              | 0.0133   | 0.0043  | 0.0087   | 37  | 88  | 92  |
| Capnocytophaga_ochracea;                     | 0.0865±  | 0.0536± | 0.086±0. | 0.0 | 0.9 | 0.1 |
|                                              | 0.0118   | 0.0077  | 019      | 29  | 81  | 23  |
| Catonella_morbi;                             | 0.094±0. | 0.0136± | 0.0218±  | 0.0 | 0.0 | 0.2 |
|                                              | 0225     | 0.0032  | 0.0055   | 01  | 02  | 18  |
| Cercis_gigantea;                             | 0.0319±  | 0.0121± | 0.0261±  | 0.0 | 0.7 | 0.5 |
|                                              | 0.008    | 0.0034  | 0.0163   | 36  | 89  | 04  |

|                                   |         |         |         |     |     |     |
|-----------------------------------|---------|---------|---------|-----|-----|-----|
| Chlorobi_bacterium_canine_oral_t  | 0.0035± | 0±0     | 0.0016± | 0.0 | 0.5 | 0.0 |
| axon_046;                         | 0.0026  |         | 0.0014  | 01  | 44  | 00  |
| Clostridiales_bacterium_canine_or | 0.0025± | 0.0003± | 0±0     | 0.0 | 0.0 | 0.3 |
| al_taxon_028;                     | 0.0014  | 0.0002  |         | 41  | 01  | 05  |
| Clostridium_disporicum;           | 0.0027± | 0±0     | 0±0     | 0.0 | 0.0 | 1.0 |
|                                   | 0.0016  |         |         | 01  | 12  | 00  |
| Deinococcus_geothermalis;         | 0±0     | 0.0011± | 0±0     | 0.0 | 1.0 | 0.0 |
|                                   |         | 0.0011  |         | 00  | 00  | 01  |
| Desulfomicrobium_orale;           | 0.0062± | 0±0     | 0.0002± | 0.0 | 0.0 | 0.1 |
|                                   | 0.0036  |         | 0.0002  | 01  | 18  | 44  |
| Dialister_pneumosintes;           | 0.0714± | 0.0197± | 0.0313± | 0.0 | 0.0 | 0.1 |
|                                   | 0.0151  | 0.0037  | 0.0063  | 01  | 24  | 12  |
| Eubacterium_minutum;              | 0.0016± | 0.0004± | 0.0028± | 0.0 | 0.8 | 0.3 |
|                                   | 0.0005  | 0.0002  | 0.0023  | 02  | 27  | 54  |
| Eubacterium_nodatum;              | 0.0815± | 0.0221± | 0.0443± | 0.0 | 0.1 | 0.1 |
|                                   | 0.0179  | 0.0054  | 0.0139  | 01  | 20  | 49  |
| Eubacterium_sp_oral_clone_FX02    | 0.0009± | 0±0     | 0.0009± | 0.0 | 1.0 | 0.0 |
| 8;                                | 0.0004  |         | 0.0009  | 00  | 00  | 00  |
| Firmicutes_bacterium_canine_oral  | 0.0013± | 0±0     | 0±0     | 0.0 | 0.0 | 1.0 |
| _taxon_309;                       | 0.001   |         |         | 00  | 00  | 00  |
| Fusobacterium_mortiferum;         | 0.0007± | 0±0     | 0±0     | 0.0 | 0.0 | 1.0 |
|                                   | 0.0004  |         |         | 01  | 07  | 00  |

|                                   |          |         |          |     |     |     |
|-----------------------------------|----------|---------|----------|-----|-----|-----|
| Fusobacterium_sp_B57-13;          | 0.0006±  | 0±0     | 0±0      | 0.0 | 0.0 | 1.0 |
|                                   | 0.0004   |         |          | 03  | 25  | 00  |
| Geobacter_soli;                   | 0.0001±  | 0.0007± | 0±0      | 0.0 | 0.5 | 0.0 |
|                                   | 0.0001   | 0.0005  |          | 25  | 18  | 09  |
| Haemophilus_parainfluenzae;       | 0.653±0. | 1.1606± | 1.1557±  | 0.0 | 0.0 | 0.9 |
|                                   | 1175     | 0.2292  | 0.2604   | 50  | 97  | 91  |
| Ileibacterium_massiliense;        | 0.0006±  | 0±0     | 0±0      | 0.0 | 0.0 | 1.0 |
|                                   | 0.0004   |         |          | 03  | 25  | 00  |
| Kingella_denitrificans;           | 0.1289±  | 0.0655± | 0.1066±  | 0.0 | 0.6 | 0.3 |
|                                   | 0.0268   | 0.0141  | 0.0395   | 48  | 63  | 46  |
| Kocuria_kristinae;                | 0.0008±  | 0±0     | 0±0      | 0.0 | 0.0 | 1.0 |
|                                   | 0.0005   |         |          | 00  | 04  | 00  |
| Lachnoanaerobaculum_sp_OBRC5      | 0.0041±  | 0.0109± | 0.0069±  | 0.0 | 0.2 | 0.2 |
| -5;                               | 0.0014   | 0.0029  | 0.002    | 30  | 61  | 86  |
| Lachnospiraceae_bacterium_feline  | 0.0759±  | 0.0076± | 0.042±0. | 0.0 | 0.0 | 0.0 |
| _oral_taxon_021;                  | 0.0124   | 0.0021  | 0.0151   | 01  | 79  | 04  |
| Lachnospiraceae_oral_clone_MCE    | 0.0079±  | 0.0011± | 0.002±0. | 0.0 | 0.0 | 0.1 |
| 9_173;                            | 0.0013   | 0.0004  | 0.0009   | 01  | 04  | 17  |
| Lachnospiraceae_oral_clone_MCE    | 0.0062±  | 0.0025± | 0.0053±  | 0.0 | 0.7 | 0.2 |
| 9_31;                             | 0.0014   | 0.0009  | 0.0021   | 35  | 45  | 93  |
| Leptotrichia_sp_oral_clone_EI013; | 0.0525±  | 0.8182± | 0.2931±  | 0.0 | 0.0 | 0.2 |
|                                   | 0.02     | 0.3924  | 0.0987   | 23  | 18  | 82  |

|                                  |          |          |          |     |     |     |
|----------------------------------|----------|----------|----------|-----|-----|-----|
| Leptotrichia_sp_oral_clone_EX10  | 0.01±0.0 | 0.0024±  | 0.0074±  | 0.0 | 0.5 | 0.1 |
| 3;                               | 031      | 0.0007   | 0.0029   | 12  | 84  | 27  |
| Leptotrichia_sp_oral_clone_FP036 | 0.1017±  | 0.5087±  | 0.3562±  | 0.0 | 0.0 | 0.4 |
| ;                                | 0.0309   | 0.1695   | 0.0755   | 08  | 04  | 41  |
| Leptotrichia_sp_oral_taxon_847;  | 0.0146±  | 0.004±0. | 0.0032±  | 0.0 | 0.0 | 0.6 |
|                                  | 0.0046   | 0013     | 0.001    | 27  | 13  | 63  |
| Moraxella_lacunata;              | 0.5534±  | 0.113±0. | 0.008±0. | 0.0 | 0.0 | 0.1 |
|                                  | 0.2097   | 0721     | 0058     | 36  | 05  | 24  |
| Mycoplasma_spermatophilum;       | 0.0001±  | 0.0009±  | 0±0      | 0.0 | 0.5 | 0.0 |
|                                  | 0.0001   | 0.0008   |          | 05  | 18  | 02  |
| Mycoplasmataceae_genomosp_P1     | 0.0813±  | 0.004±0. | 0.0149±  | 0.0 | 0.0 | 0.5 |
| _oral_clone_MB1_G23;             | 0.0362   | 0022     | 0.0123   | 19  | 75  | 95  |
| Neisseria_flava;                 | 1.9255±  | 0.6857±  | 1.0526±  | 0.0 | 0.1 | 0.3 |
|                                  | 0.4719   | 0.1148   | 0.3635   | 17  | 56  | 85  |
| Nitrospira_japonica;             | 0.0009±  | 0.0001±  | 0±0      | 0.0 | 0.0 | 1.0 |
|                                  | 0.0008   | 0.0001   |          | 01  | 02  | 00  |
| Olsenella_uli;                   | 0.0016±  | 0.0003±  | 0.0008±  | 0.0 | 0.0 | 0.1 |
|                                  | 0.0005   | 0.0001   | 0.0005   | 00  | 88  | 17  |
| Oribacterium_sp_oral_taxon_102;  | 0.0173±  | 0.0031±  | 0.0065±  | 0.0 | 0.0 | 0.3 |
|                                  | 0.0043   | 0.0009   | 0.0032   | 01  | 70  | 62  |
| Peptostreptococcus_sp_oral_clone | 0.0042±  | 0.0012±  | 0.0004±  | 0.0 | 0.0 | 0.0 |
| _AP24;                           | 0.0015   | 0.0004   | 0.0003   | 34  | 02  | 77  |

|                                |          |          |         |     |     |     |
|--------------------------------|----------|----------|---------|-----|-----|-----|
| Phocaecicola_abscessus;        | 0.0241±  | 0.005±0. | 0.0161± | 0.0 | 0.3 | 0.0 |
|                                | 0.0036   | 001      | 0.0071  | 01  | 17  | 35  |
| Porphyromonas_endodontalis;    | 0.9003±  | 0.4519±  | 1.2803± | 0.0 | 0.3 | 0.0 |
|                                | 0.0837   | 0.0849   | 0.4042  | 01  | 69  | 62  |
| Porphyromonas_gingivalis;      | 1.6934±  | 0.616±0. | 0.6692± | 0.0 | 0.0 | 0.8 |
|                                | 0.2798   | 1522     | 0.2682  | 02  | 10  | 86  |
| Porphyromonas_sp_oral_clone_HF | 0.0223±  | 0.005±0. | 0.0071± | 0.0 | 0.1 | 0.7 |
| 001;                           | 0.0102   | 0018     | 0.0043  | 32  | 51  | 09  |
| Prevotella_baroniae;           | 0.1064±  | 0.0333±  | 0.0483± | 0.0 | 0.0 | 0.3 |
|                                | 0.0206   | 0.0096   | 0.0117  | 01  | 16  | 72  |
| Prevotella_buccae;             | 0.018±0. | 0.0058±  | 0.0095± | 0.0 | 0.0 | 0.2 |
|                                | 0032     | 0.0013   | 0.003   | 01  | 59  | 75  |
| Prevotella_denticola;          | 0.2363±  | 0.0472±  | 0.1351± | 0.0 | 0.3 | 0.1 |
|                                | 0.0644   | 0.0087   | 0.066   | 01  | 55  | 67  |
| Prevotella_disiens;            | 0.0001±  | 0.001±0. | 0.0003± | 0.0 | 0.3 | 0.0 |
|                                | 0.0001   | 0009     | 0.0003  | 01  | 10  | 87  |
| Prevotella_enoeca;             | 0.0228±  | 0.0093±  | 0.0174± | 0.0 | 0.4 | 0.1 |
|                                | 0.0042   | 0.002    | 0.0046  | 03  | 13  | 09  |
| Prevotella_genomosp_C2;        | 0.0362±  | 0.0171±  | 0.0182± | 0.0 | 0.0 | 0.8 |
|                                | 0.0078   | 0.004    | 0.0039  | 25  | 48  | 44  |
| Prevotella_genomosp_P6;        | 0.3194±  | 0.1664±  | 0.1299± | 0.0 | 0.0 | 0.3 |
|                                | 0.0457   | 0.0282   | 0.0197  | 10  | 02  | 22  |

|                                 |         |          |          |     |     |     |
|---------------------------------|---------|----------|----------|-----|-----|-----|
| Prevotella_heparinolytica;      | 0.0603± | 0.0101±  | 0.0113±  | 0.0 | 0.0 | 0.9 |
|                                 | 0.0168  | 0.0045   | 0.0062   | 01  | 07  | 02  |
| Prevotella_intermedia;          | 0.7991± | 0.3185±  | 0.4838±  | 0.0 | 0.1 | 0.3 |
|                                 | 0.1355  | 0.0685   | 0.1382   | 04  | 00  | 17  |
| Prevotella_loescheii;           | 0.1401± | 0.0634±  | 0.0567±  | 0.0 | 0.0 | 0.7 |
|                                 | 0.0274  | 0.0137   | 0.0172   | 08  | 05  | 69  |
| Prevotella_maculosa;            | 0.0167± | 0.0066±  | 0.0108±  | 0.0 | 0.1 | 0.0 |
|                                 | 0.0034  | 0.0011   | 0.0023   | 01  | 72  | 96  |
| Prevotella_marshii;             | 0.0223± | 0.0087±  | 0.0105±  | 0.0 | 0.0 | 0.7 |
|                                 | 0.0043  | 0.0035   | 0.0027   | 13  | 16  | 95  |
| Prevotella_multiformis;         | 0.0694± | 0.0053±  | 0.0303±  | 0.0 | 0.3 | 0.0 |
|                                 | 0.0333  | 0.0026   | 0.0133   | 02  | 43  | 60  |
| Prevotella_oris;                | 0.4923± | 0.3017±  | 0.5928±  | 0.0 | 0.6 | 0.1 |
|                                 | 0.0615  | 0.0487   | 0.1686   | 14  | 13  | 08  |
| Prevotella_saccharolytica;      | 0.0266± | 0.0138±  | 0.0155±  | 0.0 | 0.0 | 0.6 |
|                                 | 0.0049  | 0.0024   | 0.0027   | 13  | 35  | 31  |
| Prevotella_shahii;              | 0.2698± | 0.6049±  | 0.3227±  | 0.0 | 0.8 | 0.2 |
|                                 | 0.0489  | 0.1452   | 0.1606   | 08  | 60  | 03  |
| Prevotella_sp;                  | 0.0042± | 0.0007±  | 0.001±0. | 0.0 | 0.0 | 0.4 |
|                                 | 0.0011  | 0.0003   | 0005     | 03  | 14  | 80  |
| Prevotella_sp_oral_clone_DA058; | 1.0405± | 0.144±0. | 0.3167±  | 0.0 | 0.0 | 0.1 |
|                                 | 0.2423  | 0653     | 0.0952   | 01  | 02  | 51  |

|                                   |          |         |          |     |     |     |
|-----------------------------------|----------|---------|----------|-----|-----|-----|
| Prevotella_sp_oral_clone_P4PB_8   | 0.051±0. | 0.1124± | 0.1197±  | 0.0 | 0.0 | 0.8 |
| 3_P2;                             | 0086     | 0.0207  | 0.0297   | 06  | 29  | 20  |
| Prevotella_zoogeoformans;         | 0.0091±  | 0.0001± | 0.0083±  | 0.0 | 0.9 | 0.1 |
|                                   | 0.0043   | 0.0001  | 0.0057   | 09  | 01  | 56  |
| Pseudoramibacter_alactolyticus;   | 0.0059±  | 0.0019± | 0.0031±  | 0.0 | 0.1 | 0.4 |
|                                   | 0.0015   | 0.001   | 0.0011   | 30  | 57  | 25  |
| Pyramidobacter_piscolens;         | 0.0057±  | 0.0007± | 0.0005±  | 0.0 | 0.0 | 0.7 |
|                                   | 0.0015   | 0.0003  | 0.0003   | 01  | 01  | 98  |
| Rothia_aeria;                     | 0.0007±  | 0.0038± | 0.0035±  | 0.0 | 0.3 | 0.9 |
|                                   | 0.0003   | 0.0017  | 0.0025   | 50  | 16  | 45  |
| Shuttleworthia_satelles;          | 0.0096±  | 0.0029± | 0.004±0. | 0.0 | 0.0 | 0.5 |
|                                   | 0.0027   | 0.0012  | 0013     | 23  | 82  | 40  |
| Sneathia_amnii;                   | 0±0      | 0.0006± | 0.0019±  | 0.0 | 0.0 | 0.0 |
|                                   |          | 0.0006  | 0.0011   | 04  | 00  | 07  |
| Spirochaeta_sp_canine_oral_taxon  | 0.0058±  | 0.0001± | 0.0012±  | 0.0 | 0.1 | 0.0 |
| _314;                             | 0.0026   | 0.0001  | 0.0012   | 01  | 10  | 00  |
| Spirochaeta_sp_canine_oral_taxon  | 0.0013±  | 0.0003± | 0.0002±  | 0.0 | 0.0 | 0.7 |
| _379;                             | 0.0005   | 0.0002  | 0.0002   | 05  | 08  | 16  |
| Synergistetes_bacterium_oral_taxo | 0.0544±  | 0.0137± | 0.0395±  | 0.0 | 0.6 | 0.0 |
| n_363;                            | 0.0186   | 0.0031  | 0.0081   | 02  | 66  | 06  |
| Syntrophomonadaceae_genomosp_     | 0.0077±  | 0.0004± | 0.0043±  | 0.0 | 0.4 | 0.3 |
| P1;                               | 0.0028   | 0.0003  | 0.0035   | 01  | 84  | 15  |

|                                    |          |         |         |     |     |     |
|------------------------------------|----------|---------|---------|-----|-----|-----|
| Tannerella_forsythia;              | 0.145±0. | 0.0682± | 0.0954± | 0.0 | 0.2 | 0.3 |
|                                    | 0316     | 0.0146  | 0.0257  | 27  | 17  | 82  |
| Tissierella_sp_feline_oral_taxon_0 | 0.014±0. | 0.0007± | 0.0088± | 0.0 | 0.4 | 0.0 |
| 25;                                | 0042     | 0.0004  | 0.0053  | 01  | 80  | 36  |
| Treponema_denticola;               | 0.2083±  | 0.0593± | 0.0907± | 0.0 | 0.0 | 0.3 |
|                                    | 0.0348   | 0.019   | 0.0256  | 01  | 06  | 57  |
| Treponema_genomosp_P4_oral_cl      | 0.035±0. | 0.0015± | 0.0023± | 0.0 | 0.0 | 0.6 |
| one_MB2_G19;                       | 014      | 0.0012  | 0.0016  | 03  | 05  | 58  |
| Treponema_medium;                  | 0.3073±  | 0.1058± | 0.1839± | 0.0 | 0.0 | 0.1 |
|                                    | 0.0343   | 0.0189  | 0.0461  | 01  | 36  | 35  |
| Treponema_parvum;                  | 0.0029±  | 0.0005± | 0.0014± | 0.0 | 0.0 | 0.0 |
|                                    | 0.0008   | 0.0002  | 0.0005  | 01  | 95  | 19  |
| Treponema_refringens;              | 0.0161±  | 0.0638± | 0.0333± | 0.0 | 0.1 | 0.3 |
|                                    | 0.0038   | 0.0272  | 0.0103  | 21  | 48  | 61  |
| Treponema_sp_3:G:BB003;            | 0.0347±  | 0.0075± | 0.0081± | 0.0 | 0.0 | 0.8 |
|                                    | 0.0082   | 0.003   | 0.0027  | 03  | 05  | 91  |
| Treponema_sp_5:22:BH022;           | 0.1107±  | 0.0042± | 0.0297± | 0.0 | 0.1 | 0.4 |
|                                    | 0.0466   | 0.0034  | 0.0246  | 15  | 42  | 03  |
| Treponema_sp_5:C:AT040;            | 0.1703±  | 0.0254± | 0.0605± | 0.0 | 0.0 | 0.0 |
|                                    | 0.0716   | 0.009   | 0.015   | 03  | 48  | 44  |
| Treponema_sp_9:A:D01;              | 0.0072±  | 0.0011± | 0.0036± | 0.0 | 0.0 | 0.0 |
|                                    | 0.0016   | 0.0004  | 0.0011  | 02  | 73  | 50  |



|                                           |          |         |          |     |     |     |
|-------------------------------------------|----------|---------|----------|-----|-----|-----|
| Treponema_sp_canine_oral_taxon            | 0.0183±  | 0.0032± | 0.0081±  | 0.0 | 0.0 | 0.0 |
| _201;                                     | 0.003    | 0.001   | 0.0022   | 01  | 12  | 56  |
| Treponema_sp_I:C:BA223;                   | 0.0115±  | 0±0     | 0.0015±  | 0.0 | 0.0 | 0.0 |
|                                           | 0.0041   |         | 0.0011   | 01  | 30  | 00  |
| Treponema_sp_I:V:AU076;                   | 0.0453±  | 0.0034± | 0.0069±  | 0.0 | 0.0 | 0.1 |
|                                           | 0.012    | 0.0014  | 0.002    | 01  | 01  | 85  |
| Treponema_sp_II:I:C53;                    | 0.0177±  | 0.0013± | 0.0022±  | 0.0 | 0.0 | 0.5 |
|                                           | 0.0077   | 0.0009  | 0.001    | 05  | 15  | 74  |
| Treponema_sp_oral_taxon_271;              | 0.004±0. | 0.0001± | 0.0009±  | 0.0 | 0.0 | 0.0 |
|                                           | 0012     | 0.0001  | 0.0005   | 01  | 19  | 03  |
| Treponema_vincentii;                      | 0.01±0.0 | 0.0042± | 0.0042±  | 0.0 | 0.0 | 0.9 |
|                                           | 012      | 0.0013  | 0.001    | 01  | 02  | 77  |
| Veillonellaceae_bacterium_oral_taxon_131; | 0.0018±  | 0.0002± | 0.0004±  | 0.0 | 0.0 | 0.4 |
|                                           | 0.001    | 0.0002  | 0.0003   | 00  | 04  | 38  |
| Wolinella_sp_feline_oral_taxon_098;       | 0.0169±  | 0.0009± | 0.003±0. | 0.0 | 0.0 | 0.0 |
|                                           | 0.0035   | 0.0004  | 0011     | 01  | 01  | 74  |

NSctrl, non-smoker/healthy; NSras, non-smoker/Recurrent aphthous stomatitis; Sras, smoker/ recurrent aphthous stomatitis. P1-value, NSctrl vs. NSras; P2-value, NSctrl vs. Sras; P3-value, NSras vs. Sras.
